# Supplementary material for: Significantly enhanced mechanoluminescence from Nb5+ co-doped ZrO2:Sm3+via a high valence ion doping strategy
Source: Royal Society of Chemistry journal article supplement (doi:10.1039/d3tc02105j), 2023-01-01
Supplement: d3tc02105j1.pdf [file d3tc02105j1.pdf]

Electronic supplementary information (ESI†)

**Significantly enhanced mechanoluminescence from Nb<sup>5+</sup> co-doped ZrO<sub>2</sub>:Sm<sup>3+</sup> via high valence ion doping strategy**

*Jia Tong,<sup>a</sup> Jun Huan,<sup>a</sup> Xin Yu,<sup>a</sup> Jia-Hui Cheng,<sup>a</sup> Zhi-Jun Zhang,<sup>a</sup> Juan-Juan Xing,<sup>a</sup> Jing-Tai Zhao,<sup>b</sup> Xin-Xin Yang,<sup>a,\*</sup>*

<sup>a</sup> School of Materials Science and Engineering, Shanghai University, Shanghai, 200072, P.R. China

<sup>b</sup> School of Materials Science and Engineering, Guilin University of Technology, Guilin, 541000, P. R. China

E-mail: [yangxinxin@t.shu.edu.cn](mailto:yangxinxin@t.shu.edu.cn)

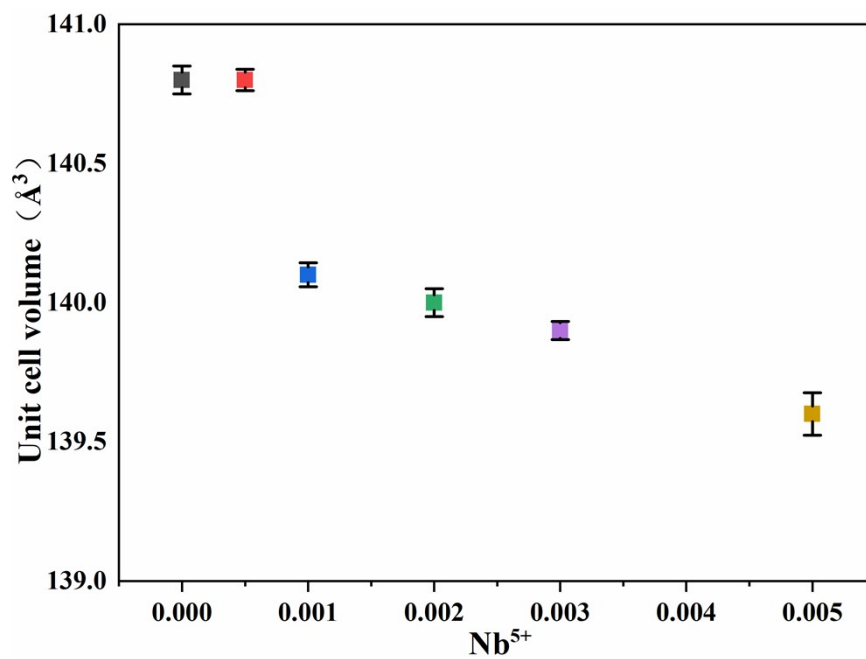

**Fig. S1.** The relationship between the unit cell volumes of the  $\text{ZrO}_2:\text{Sm}^{3+}$ ,  $\text{Nb}^{5+}$  phosphors and  $\text{Nb}^{5+}$  concentration.

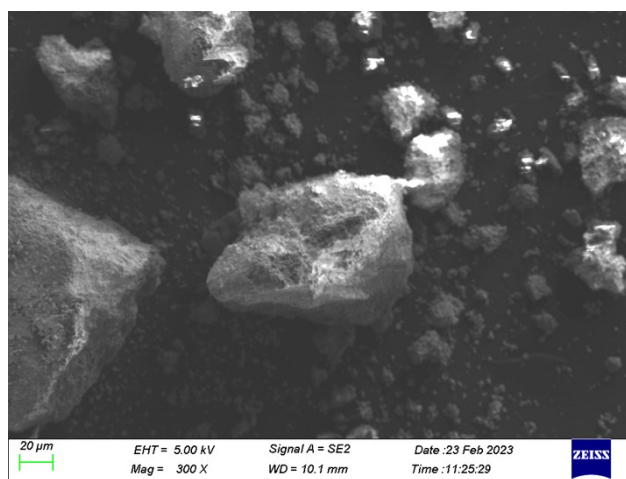

**Fig. S2.** SEM images of  $\text{ZrO}_2:\text{Sm}^{3+}, 0.003\text{Nb}^{5+}$

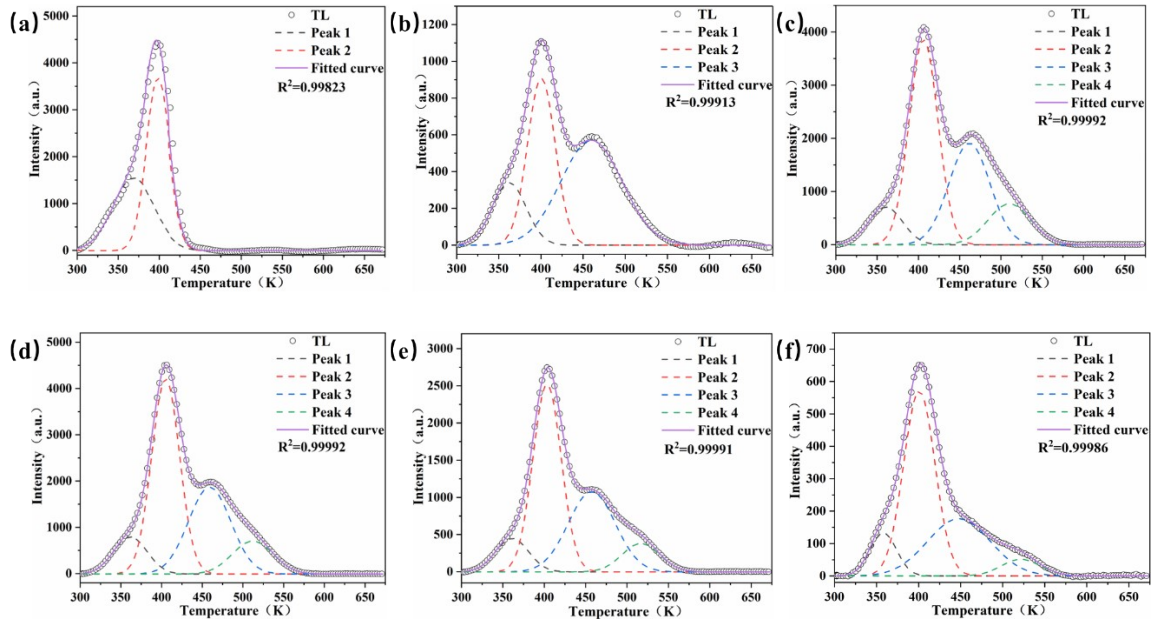

**Fig. S3** (a) TL curves and the fitting curves of  $\text{ZrO}_2$  phosphors; (b) TL curves and the fitting curves of  $\text{ZrO}_2:\text{Sm}^{3+}$  phosphors; (c) TL curves and the fitting curves of  $\text{ZrO}_2:\text{Sm}^{3+}, 0.0005\text{Nb}^{5+}$  phosphors; (d) TL curves and the fitting curves of  $\text{ZrO}_2:\text{Sm}^{3+}, 0.001\text{Nb}^{5+}$  phosphors; (e) TL curves and the fitting curves of  $\text{ZrO}_2:\text{Sm}^{3+}, 0.002\text{Nb}^{5+}$  phosphors; (f) TL curves and the fitting curves of  $\text{ZrO}_2:\text{Sm}^{3+}, 0.005\text{Nb}^{5+}$  phosphors;

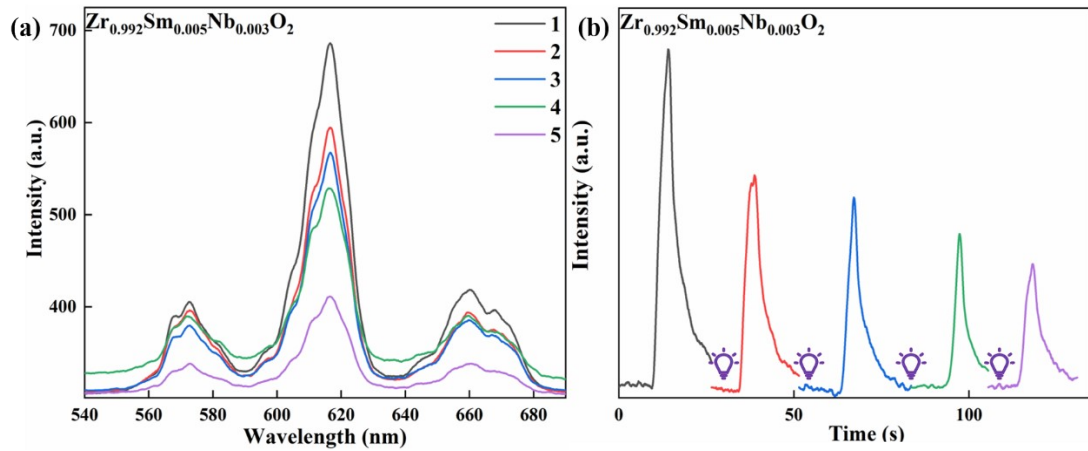

**Fig. S4** ML recovery behavior under UV irradiation 3 min. (a) ML spectra under 5 times UV irradiation-load cycles. (b) ML reproducibility during 5 load cycles after UV irradiation in each cycle.

**Table. S1.** The fitting results of different samples

|              | $\text{ZrO}_2$ | $\text{ZrO}_2:$<br>$0.005\text{Sm}$ | $\text{ZrO}_2:$<br>$0.005\text{Sm},$<br>$0.0005\text{Nb}$ | $\text{ZrO}_2:$<br>$0.005\text{Sm},$<br>$0.001\text{Nb}$ | $\text{ZrO}_2:$<br>$0.005\text{Sm},$<br>$0.002\text{Nb}$ | $\text{ZrO}_2:$<br>$0.005\text{Sm},$<br>$0.003\text{Nb}$ | $\text{ZrO}_2:$<br>$0.005\text{Sm},$<br>$0.005\text{Nb}$ |
|--------------|----------------|-------------------------------------|-----------------------------------------------------------|----------------------------------------------------------|----------------------------------------------------------|----------------------------------------------------------|----------------------------------------------------------|
| <b>Trap1</b> | 0.77           | 0.73                                | 0.72                                                      | 0.72                                                     | 0.72                                                     | 0.71                                                     | 0.72                                                     |
| <b>Trap2</b> | 0.83           | 0.80                                | 0.81                                                      | 0.81                                                     | 0.81                                                     | 0.81                                                     | 0.81                                                     |

|                      |         |         |         |         |         |         |         |
|----------------------|---------|---------|---------|---------|---------|---------|---------|
| <b>Trap3</b>         | -       | 0.92    | 0.92    | 0.92    | 0.91    | 0.92    | 0.90    |
| <b>Trap4</b>         | -       | -       | 1.02    | 1.02    | 1.03    | 1.03    | 1.04    |
| <b>R<sup>2</sup></b> | 0.99823 | 0.99913 | 0.99992 | 0.99992 | 0.99991 | 0.99971 | 0.99986 |
